# Supplementary material for: Characterization of Sodium Alginate-Based Films Blended with Olive Leaf and Laurel Leaf Extracts Obtained by Ultrasound-Assisted Technology
Source: MDPI journal article supplement (doi:10.3390/foods12224076), 2023-11-09
Supplement: s1 [file s1]

Supplementary Table S1. Total phenolic compounds (TPC) on simulant media expressed in mg/L gallic acid equivalent.

| Filme                       | Simulant | 1d                            | 3d                            | 6d                            | 9d                              | 15d                            | <i>p</i> |
|-----------------------------|----------|-------------------------------|-------------------------------|-------------------------------|---------------------------------|--------------------------------|----------|
| SA + LLE 1%                 | Water    | 466.19 ±15.10 <sup>de</sup>   |                               |                               |                                 |                                |          |
|                             | Eth. 10% | 458.70 ±41.87 <sup>de</sup>   |                               |                               |                                 |                                |          |
|                             | Eth. 95% | 41.30 ±2.23 <sup>g</sup>      | 63.69 ±6.86 <sup>b</sup>      | 48.64 ±6.9 <sup>c</sup>       | 39.12 ±6.74 <sup>e</sup>        | 126.70 ±103.67 <sup>c</sup>    | n.s.     |
| SA + LLE 2%                 | Water    | 1028.47 ±97.92 <sup>a</sup>   |                               |                               |                                 |                                |          |
|                             | Eth. 10% | 832.80 ±65.07 <sup>b</sup>    |                               |                               |                                 |                                |          |
|                             | Eth. 95% | 318.48 ±43.56 <sup>ef</sup>   | 371.91 ±26.79 <sup>a</sup>    | 429.45 ±128.06 <sup>ab</sup>  | 436.158 ±78.973 <sup>bc</sup>   | 471.13 ±80.91 <sup>ab</sup>    | n.s.     |
| SA + OLE 1%                 | Water    | 365.68 ±39.82 <sup>ef</sup>   |                               |                               |                                 |                                |          |
|                             | Eth. 10% | 495.90 ±47.23 <sup>e</sup>    |                               |                               |                                 |                                |          |
|                             | Eth. 95% | 245.23 ±6.04 <sup>fg C</sup>  | 421.48 ±19.48 <sup>aA</sup>   | 336.07 ±24.34 <sup>b B</sup>  | 319.15 ±39.39 <sup>cd B</sup>   | 348.45 ±33.57 <sup>bc AB</sup> | ***      |
| SA + OLE 2%                 | Water    | 666.22 ±65.38 <sup>c</sup>    |                               |                               |                                 |                                |          |
|                             | Eth. 10% | 565.98 ±45.24 <sup>cd</sup>   |                               |                               |                                 |                                |          |
|                             | Eth. 95% | 316.95 ±40.42 <sup>ef B</sup> | 461.05 ±70.68 <sup>a AB</sup> | 513.43 ±21.39 <sup>a AB</sup> | 556.70 ±100.79 <sup>ab AB</sup> | 695.15 ±151.11 <sup>a A</sup>  | *        |
| SA + LLE 0.5%<br>+ OLE 0.5% | Water    | 408.45 ±15.25 <sup>de</sup>   |                               |                               |                                 |                                |          |
|                             | Eth. 10% | 418.26 ±44.4 <sup>de</sup>    |                               |                               |                                 |                                |          |
|                             | Eth. 95% | 108.14 ±22.90 <sup>g</sup>    | 133.90 ±23.54 <sup>b</sup>    | 153.53 ±32.12 <sup>c</sup>    | 175.03 ±33.83 <sup>de</sup>     | 181.22 ±42.11 <sup>c</sup>     | n.s.     |
| SA + LLE 1%<br>+ OLE 1%     | Water    | 876.72 ±17.04 <sup>b</sup>    |                               |                               |                                 |                                |          |
|                             | Eth. 10% | 898.42 ±94.61 <sup>ab</sup>   |                               |                               |                                 |                                |          |
|                             | Eth. 95% | 348.53 ±23.87 <sup>ef D</sup> | 449.92 ±15.26 <sup>a C</sup>  | 548.53 ±12.69 <sup>a B</sup>  | 616.27 ±40.15 <sup>a AB</sup>   | 642.71 ±56.86 <sup>a A</sup>   | ***      |
| <i>p</i>                    |          | ***                           | ***                           | ***                           | ***                             | ***                            |          |

SA – sodium alginate films; OLE – olive leaf extract; LLE – laurel leaf extract. For storage time (rows), means with small letters differ significantly, \*P < 0.5, \*\*\*P < 0.001. For films (columns), means with capital letters differ significantly, \*P < 0.5, \*\*\*P < 0.001. n.s. – non-significant.

Supplementary Table S2. Antioxidant activity in simulant media expressed in mmol Trolox equivalent/L simulant.

| Filme                       | Simulant | 1d                           | 3d                         | 6d                          | 9d                         | 15d                       | <i>p</i> |
|-----------------------------|----------|------------------------------|----------------------------|-----------------------------|----------------------------|---------------------------|----------|
| SA + LLE 1%                 | Water    | 3.40 ±0.22 <sup>cde</sup>    |                            |                             |                            |                           |          |
|                             | Eth. 10% | 3.13 ±0.45 <sup>de</sup>     |                            |                             |                            |                           |          |
|                             | Eth. 95% | 0.63 ±0.10 <sup>g A</sup>    | 0.64 ±0.12 <sup>b A</sup>  | 0.23 ±0.07 <sup>b B</sup>   | 0.38 ±0.08 <sup>b AB</sup> | 0.56 ±0.03 <sup>b A</sup> | **       |
| SA + LLE 2%                 | Water    | 8.07 ±1.80 <sup>a</sup>      |                            |                             |                            |                           |          |
|                             | Eth. 10% | 5.23 ±0.33 <sup>b</sup>      |                            |                             |                            |                           |          |
|                             | Eth. 95% | 3.04 ±0.47 <sup>def B</sup>  | 3.41 ±0.75 <sup>a</sup>    | 3.15 ±0.50 <sup>a</sup>     | 3.06 ±0.30 <sup>a</sup>    | 3.61 ±0.38 <sup>a</sup>   | n.s.     |
| SA + OLE 1%                 | Water    | 1.96 ±0.50 <sup>defg</sup>   |                            |                             |                            |                           |          |
|                             | Eth. 10% | 2.47±0.33 <sup>defg</sup>    |                            |                             |                            |                           |          |
|                             | Eth. 95% | 1.36 ±0.01 <sup>fg C</sup>   | 2.42 ±0.12 <sup>a B</sup>  | 1.81 ±0.16 <sup>cd C</sup>  | 1.80 ±0.10 <sup>c C</sup>  | 3.30 ±0.31 <sup>a A</sup> | ***      |
| SA + OLE 2%                 | Water    | 3.51 ±0.36 <sup>bcd</sup>    |                            |                             |                            |                           |          |
|                             | Eth. 10% | 2.77±1.13 <sup>def</sup>     |                            |                             |                            |                           |          |
|                             | Eth. 95% | 1.79 ±0.22 <sup>efg B</sup>  | 2.83 ±0.74 <sup>a AB</sup> | 3.11 ±0.77 <sup>a AB</sup>  | 3.35±0.62 <sup>a AB</sup>  | 4.20 ±1.12 <sup>a A</sup> | *        |
| SA + LLE 0.5%<br>+ OLE 0.5% | Water    | 2.69 ±0.28 <sup>def</sup>    |                            |                             |                            |                           |          |
|                             | Eth. 10% | 3.04 ±0.37 <sup>def</sup>    |                            |                             |                            |                           |          |
|                             | Eth. 95% | 0.59 ±0.15 <sup>g B</sup>    | 0.96 ±0.10 <sup>b AB</sup> | 1.19 ±0.11 <sup>bc AB</sup> | 1.58 ±0.47 <sup>bc A</sup> | 1.42 ±0.08 <sup>b A</sup> | **       |
| SA + LLE 1%<br>+ OLE 1%     | Water    | 4.50 ±0.14 <sup>bc</sup>     |                            |                             |                            |                           |          |
|                             | Eth. 10% | 5.16 ±0.25 <sup>b</sup>      |                            |                             |                            |                           |          |
|                             | Eth. 95% | 2.16 ±0.22 <sup>defg C</sup> | 2.88 ±0.09 <sup>a B</sup>  | 2.95 ±0.14 <sup>ad B</sup>  | 3.22 ±0.10 <sup>a AB</sup> | 3.40 ±0.13 <sup>a A</sup> | ***      |
| <i>p</i>                    |          | ***                          | ***                        | ***                         | ***                        | ***                       |          |

SA – sodium alginate films; OLE – olive leaf extract; LLE – laurel leaf extract. For storage time (rows), means with small letters differ significantly, \*P < 0.5, \*\*P < 0.01, \*\*\*P < 0.001. For films (columns), means with capital letters differ significantly, \*P < 0.5, \*\*P < 0.01, \*\*\*P < 0.001. n.s. – non-significant.
